# Supplementary material for: The novel design of a remote phosphor ceramic plate for white light generation in high power LEDs
Source: Royal Society of Chemistry journal article supplement (doi:10.1039/c5tc00893j), 2015-01-01
Supplement: c5tc00893j1.pdf [file c5tc00893j1.pdf]

## Supporting Information

### Novel Design of remote phosphor ceramic plate for white generation in high power LEDs

**Author(s):** Young Hyun Song,<sup>a,∇</sup> Gill Sang Han,<sup>a,∇</sup> Eun Kyung Ji,<sup>c</sup> Min-Ji Lee,<sup>a</sup> Ye Lim Song,<sup>a</sup> Dal Sung Kong,<sup>b</sup> Mong Kwon Jung,<sup>c</sup> Byung Woo Jeong,<sup>d</sup> Hyun Suk Jung<sup>a\*</sup> and Dae-Ho Yoon<sup>a,e\*</sup>

<sup>a</sup> School of Advanced Materials Science & Engineering, Sungkyunkwan University, Suwon 440-746, Republic of Korea. Email: [dhyoon@skku.edu](mailto:dhyoon@skku.edu), [hsjung1@skku.edu](mailto:hsjung1@skku.edu)

<sup>b</sup> Department of Energy Science, Sungkyunkwan University, Suwon 440-746, Republic of Korea

<sup>c</sup> Hyosung Corporation, R&D Business Labs, Anyang 431-080, Republic of Korea

<sup>d</sup> LG Electronics, Future Device R&D Department, Seoul 137-724, Korea

<sup>e</sup> SKKU Advanced Institute of Nanotechnology (SAINT), Sungkyunkwan University, Suwon 440-746, Republic of Korea

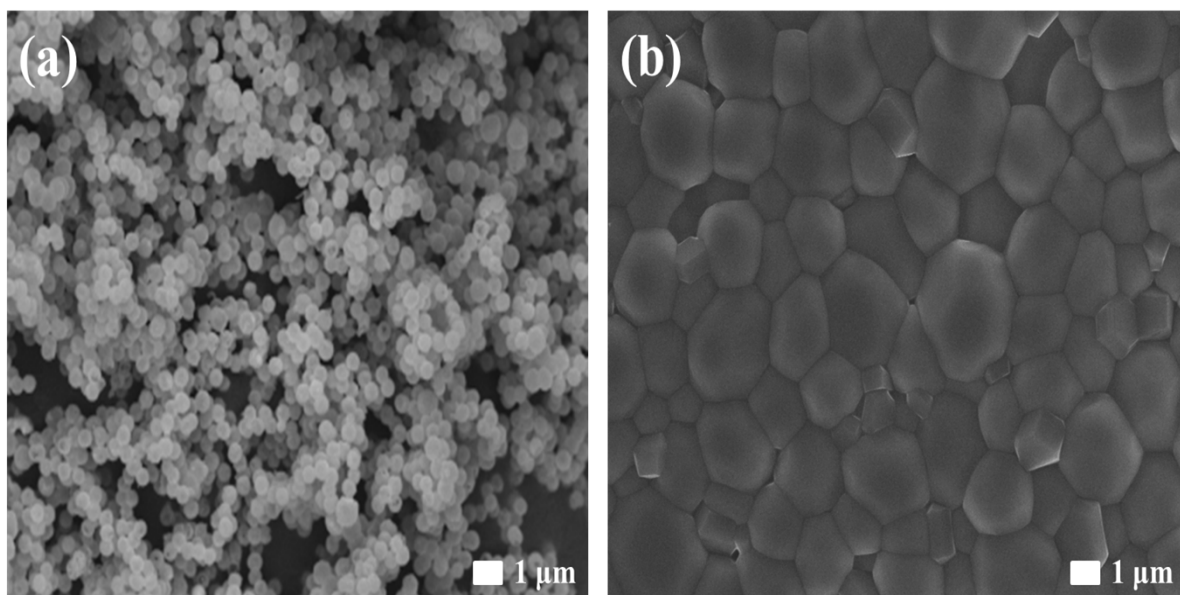

**Fig. S1** The SEM image of (a) YAG: Ce NPs, (b) The fabricated PCP using YAG: Ce NPs

|     | Correlated Color Temperature (K) |       |       |       |       |       |       |       |       |       |        |
|-----|----------------------------------|-------|-------|-------|-------|-------|-------|-------|-------|-------|--------|
|     | 0 °C                             | 10 °C | 20 °C | 30 °C | 40 °C | 50 °C | 60 °C | 70 °C | 80 °C | 90 °C | 100 °C |
| PCP | 5531                             | 5517  | 5508  | 5531  | 5526  | 5519  | 5512  | 5505  | 5500  | 5484  | 5463   |
| PS  | 5552                             | 5601  | 5564  | 5553  | 5565  | 5579  | 5621  | 5649  | 5682  | 5749  | 5778   |

**Table S1. The comparison of CCT variation**
